# Supplementary material for: Tuning solid state luminescent properties in a hydrogen bonding-directed supramolecular assembly of bis-cyclometalated iridium(iii) ethylenediamine complexes
Source: Royal Society of Chemistry journal article supplement (doi:10.1039/c2dt12108e), 2012-01-01
Supplement: c2dt12108e.pdf [file c2dt12108e.pdf]

## Supporting Information.

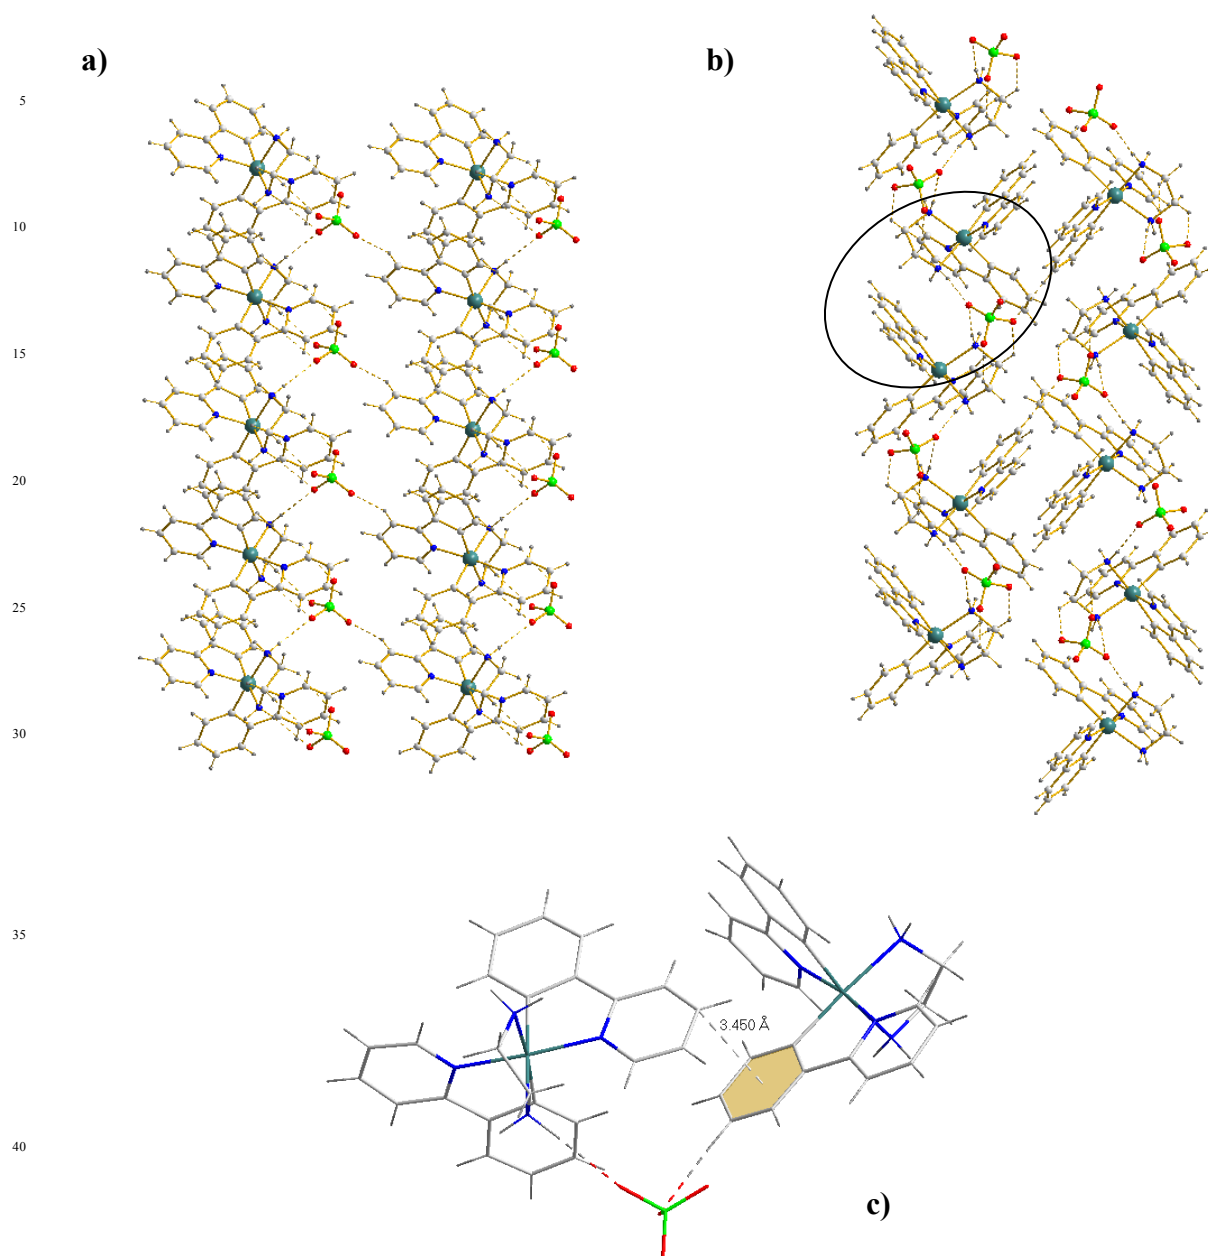

**Figure S1.** Side views of neighbouring supramolecular chains in **1c** along the *b* (a) and *c* (b) crystallographic directions. Details of the reciprocal arrangements of nearest phenylpyridine ligands, the dihedral angle between the mean planes being of 24.4° ca (c).

50

55

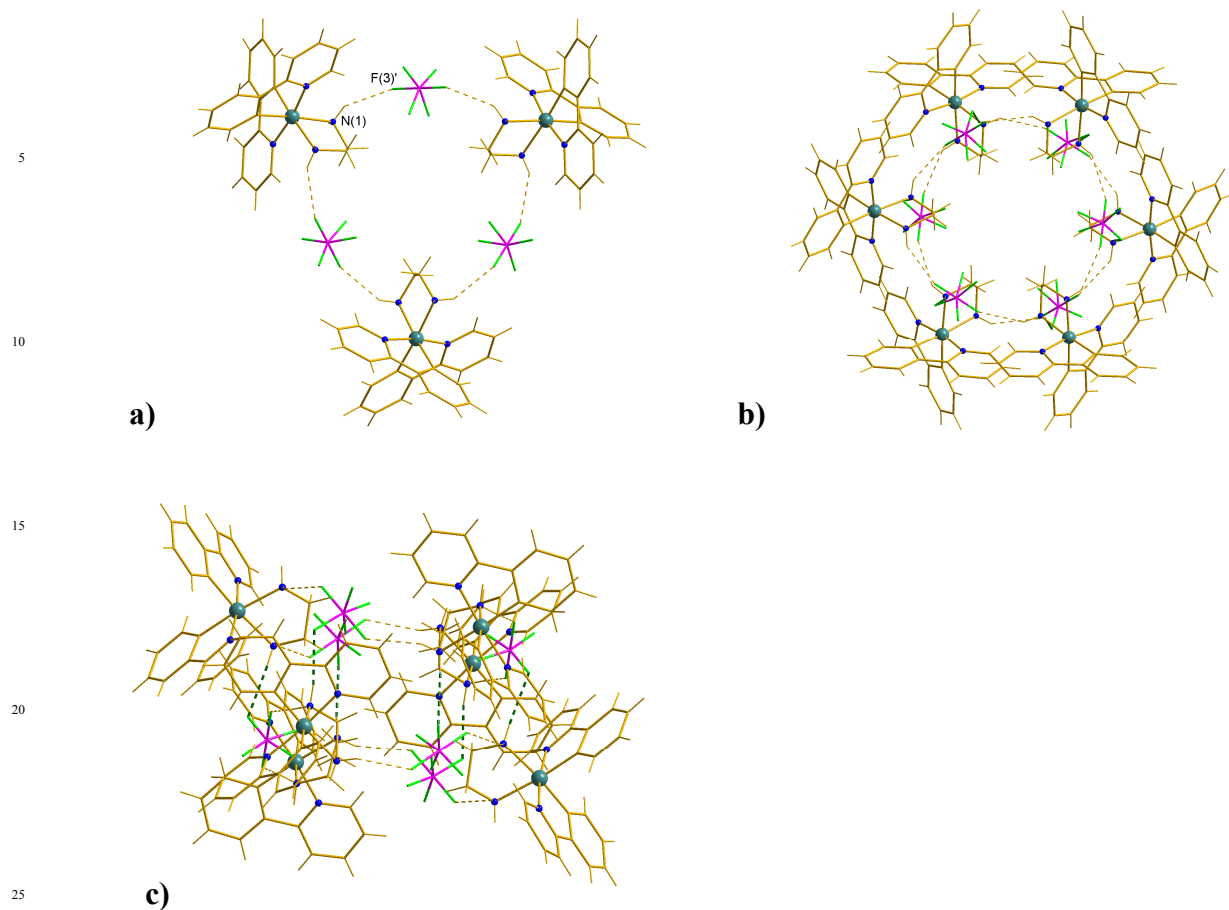

**Figure S2.** View of the supramolecular trinuclear units (a) in **2b**. Perspective (b) and side (c) view of the hexanuclear supramolecular motif assembled by means of intermolecular interactions between the trinuclear units in **2b**.

30

35

40

45

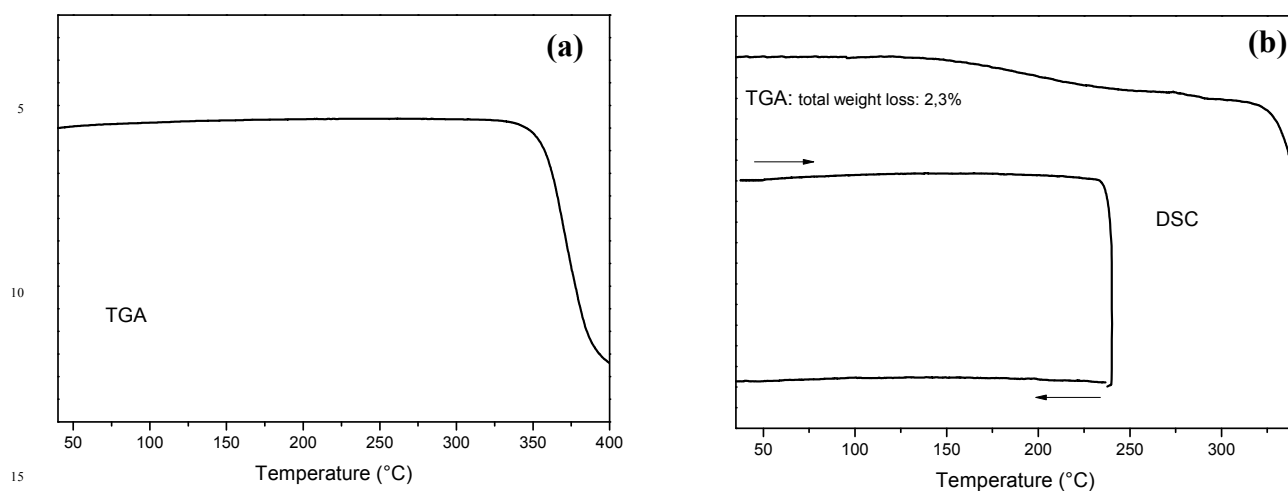

**Figure S3.** (a) TGA curve recorded on crystalline sample of **2a**; (b) TGA and DSC curves recorded on crystalline sample of **2b**

20

25

30

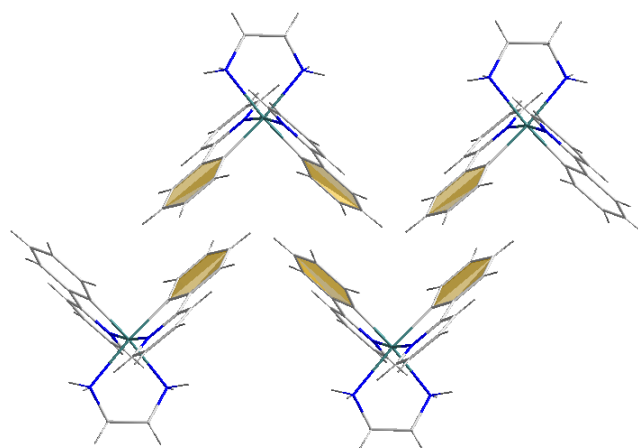

**Figure S4.** View of the  $\pi$ - $\pi$  stacking interactions between the cyclometalated phenylpyridine ligands in **2b**.

40

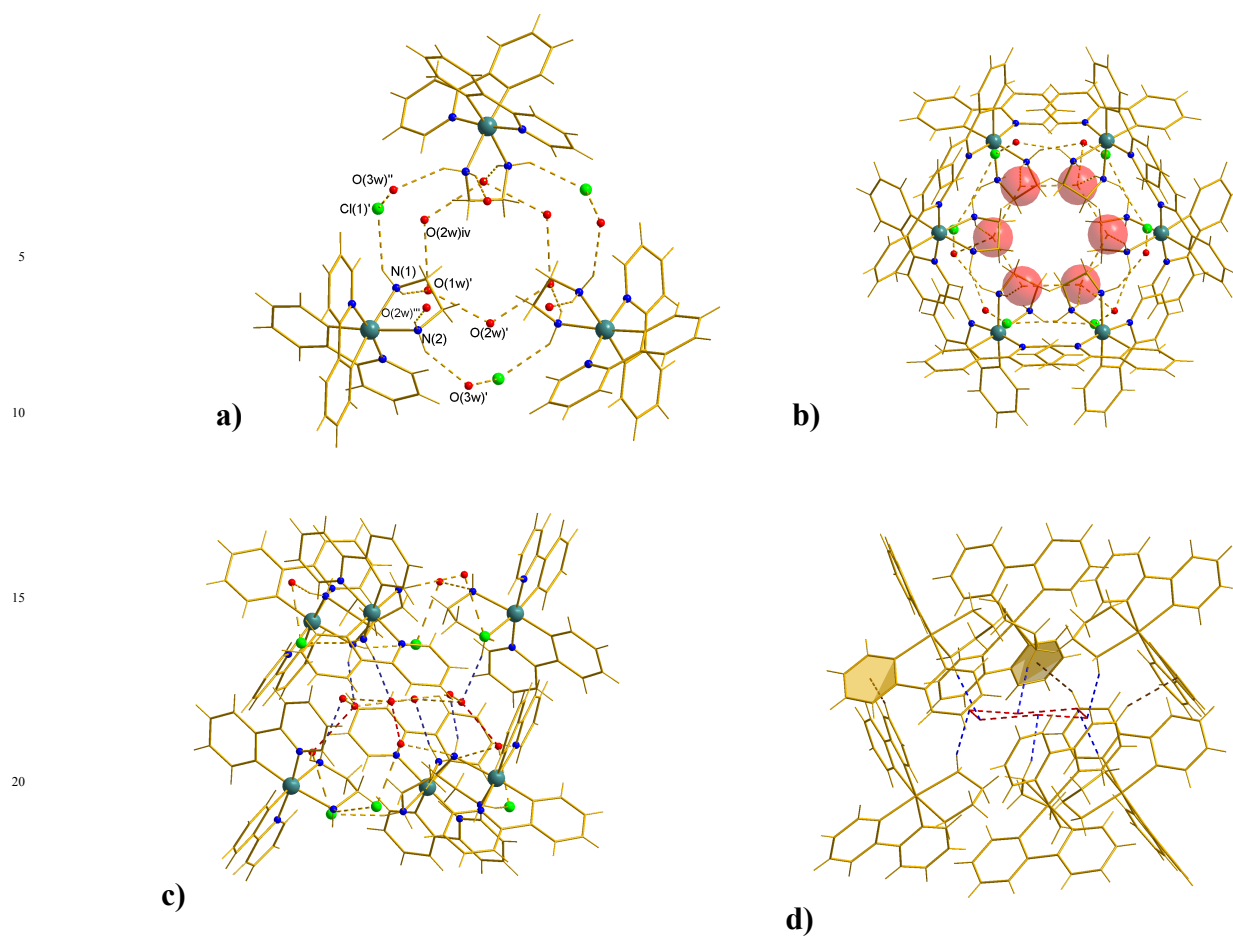

**Figure S5.** View of the supramolecular trinuclear unit supported by hydrogen bonding interactions in **3a** (a). Side (b) and perspective (c) view of the hexanuclear water cluster supported by hydrogen bonding interactions. View of the edge-to-face interactions involving phenylpyridine ligands of successive trinuclear supramolecular units (d).

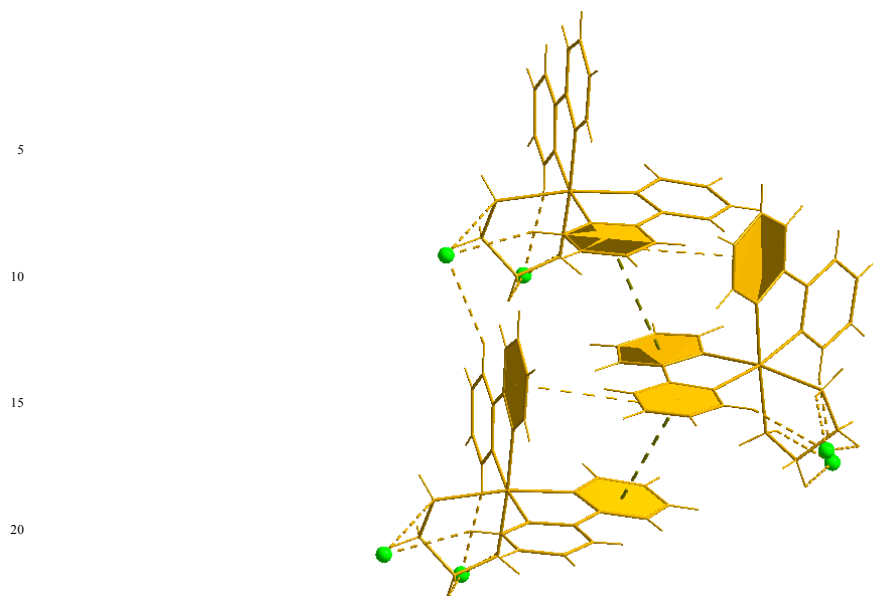

**Figure S6.** View of the  $\pi$ - $\pi$  stacking and C-H... $\pi$  edge-to-face interactions involving phenylpyridine ligands in **3b**.

**Table S1. Crystal data and selected structure refinement parameters for 1c, 2a and 4a**

| Compound                            | 1c                                                                | 2a                                                                | 4a                                                |
|-------------------------------------|-------------------------------------------------------------------|-------------------------------------------------------------------|---------------------------------------------------|
| empirical formula                   | C <sub>24</sub> H <sub>24</sub> ClIrN <sub>4</sub> O <sub>4</sub> | C <sub>24</sub> H <sub>24</sub> F <sub>6</sub> IrN <sub>4</sub> P | C <sub>48</sub> H <sub>44</sub> BIrN <sub>4</sub> |
| Crystal system                      | Orthorhombic                                                      | Triclinic                                                         | Monoclinic                                        |
| Space group                         | Pna2(1)                                                           | P-1                                                               | C2/c                                              |
| Z                                   | 4                                                                 | 2                                                                 | 4                                                 |
| fw                                  | 660.12                                                            | 705.64                                                            | 879.88                                            |
| a, Å                                | 12.8971(17)                                                       | 7.9909(6)                                                         | 10.212(5)                                         |
| b, Å                                | 16.631(2)                                                         | 10.6437(8)                                                        | 26.279(11)                                        |
| c, Å                                | 10.9986(16)                                                       | 14.8207(15)                                                       | 14.334(6)                                         |
| α, β, γ, deg                        | 90, 90, 90                                                        | 78.458(3),<br>81.685(4),<br>80.293(3)                             | 90, 95.113(11),<br>90                             |
| V, Å <sup>3</sup>                   | 2359.2(6)                                                         | 1209.32(18)                                                       | 3831(3)                                           |
| D <sub>c</sub> , g cm <sup>-3</sup> | 1.859                                                             | 1.938                                                             | 1.528                                             |
| μ, mm <sup>-1</sup>                 | 5.812                                                             | 5.654                                                             | 3.525                                             |
| Independent reflections [R(int)]    | 7728<br>[0.0464]                                                  | 4250 [0.0307]                                                     | 4226 [0.0441]                                     |
| Data/restraints/parameters          | 5447 / 1 / 326                                                    | 3938 / 0 / 326                                                    | 3885 / 0 / 245                                    |
| Goodness-of-fit on F <sup>2</sup>   | 0.894                                                             | 1.101                                                             | 1.080                                             |
| Absolute structure parameter        | -0.004(6)                                                         | -                                                                 | -                                                 |
| <sup>a</sup> R1 [I > 2 σ (I)]       | 0.0256                                                            | 0.0439                                                            | 0.0236                                            |
| <sup>b,c</sup> wR2                  | 0.0509                                                            | 0.1111                                                            | 0.0588                                            |

<sup>a</sup>R1 =  $\sum ||F_o| - |F_c|| / \sum |F_o|$ . <sup>b</sup>wR2 =  $\{ \sum [w(F_o^2 - F_c^2)^2] / [\sum (w(F_o^2)^2)] \}^{1/2}$ . <sup>c</sup>w =  $1 / [ \sigma^2(F_o^2) + (aP)^2 + bP ]$  with  $P = [F_o^2 + 2F_c^2] / 3$ ,  $a = 0.0278$  (1c), 0.0479 (2a), 0.0283 (4a), and  $b = 0.00$  (1c), 8.98 (2a), 4.20 (4a).

**Table S2. Crystal data and selected structure refinement parameters for 2b, 3a and 3b**

| Compound                            | 2b                                                                                  | 3a                                                                | 3b                                                                                             |
|-------------------------------------|-------------------------------------------------------------------------------------|-------------------------------------------------------------------|------------------------------------------------------------------------------------------------|
| empirical formula                   | C <sub>26</sub> H <sub>28</sub> F <sub>6</sub> IrN <sub>4</sub> O <sub>0.67</sub> P | C <sub>24</sub> H <sub>30</sub> ClIrN <sub>4</sub> O <sub>3</sub> | C <sub>24</sub> H <sub>24</sub> ClIrN <sub>4</sub> 2(CH <sub>3</sub> OH)<br>(H <sub>2</sub> O) |
| Crystal system                      | Trigonal                                                                            | Trigonal                                                          | Monoclinic                                                                                     |
| Space group                         | P-3c1                                                                               | R3c                                                               | Cc                                                                                             |
| Z                                   | 6                                                                                   | 18                                                                | 4                                                                                              |
| fw                                  | 744.36                                                                              | 650.17                                                            | 678.22                                                                                         |
| a, Å                                | 21.494(5)                                                                           | 29.092(7)                                                         | 13.534(3)                                                                                      |
| b, Å                                | 21.494(5)                                                                           | 29.092(7)                                                         | 22.985(3)                                                                                      |
| c, Å                                | 10.380(5)                                                                           | 15.193(4)                                                         | 10.2524(14)                                                                                    |
| α, β, γ, deg                        | 90, 90, 120                                                                         | 90, 90, 120                                                       | 90, 109.164(8), 90                                                                             |
| V, Å <sup>3</sup>                   | 4153(2)                                                                             | 11135(5)                                                          | 3012.7(8)                                                                                      |
| D <sub>c</sub> , g cm <sup>-3</sup> | 1.786                                                                               | 1.745                                                             | 1.495                                                                                          |
| μ, mm <sup>-1</sup>                 | 4.946                                                                               | 5.536                                                             | 4.551                                                                                          |
| Independent reflections [R(int)]    | 2971 [0.0576]                                                                       | 5450 [0.0389]                                                     | 6634 [0.0408]                                                                                  |
| Data/restraints/parameters          | 2286 / 2 / 196                                                                      | 5291 / 1 / 298                                                    | 6273 / 2 / 271                                                                                 |
| Goodness-of-fit on F <sup>2</sup>   | 1.014                                                                               | 1.203                                                             | 1.078                                                                                          |
| Absolute structure parameter        | -                                                                                   | -0.004(7)                                                         | -0.004(5)                                                                                      |
| <sup>a</sup> R1 [I > 2 σ (I)]       | 0.0321                                                                              | 0.0174                                                            | 0.0182                                                                                         |
| <sup>b,c</sup> wR2                  | 0.0594                                                                              | 0.0443                                                            | 0.0470                                                                                         |

<sup>a</sup>R1 =  $\sum ||F_o| - |F_c|| / \sum |F_o|$ . <sup>b</sup>wR2 =  $\{ \sum [w(F_o^2 - F_c^2)^2] / [\sum (w(F_o^2)^2)] \}^{1/2}$ . <sup>c</sup>w =  $1 / [ \sigma^2(F_o^2) + (aP)^2 + bP ]$  with  $P = [F_o^2 + 2F_c^2] / 3$ ,  $a = 0.0283$  (**2b**),  $0.0316$  (**3a**),  $0.0270$  (**3b**), and  $b = 0.96$  (**2b**),  $4.28$  (**3a**),  $0.00$  (**3b**).

10

15

20

25

30

35

**Table S3. Selected Bond lengths [ $\text{\AA}$ ] and angles [ $^\circ$ ] for compounds 1c-4a.**

| Compound            | 1c       | 2a       | 2b       | 3a       | 3b       | 4a       |
|---------------------|----------|----------|----------|----------|----------|----------|
| Ir(1)-C(1)          | 1.994(4) | 2.009(8) | 2.004(5) | 1.990(6) | 2.040(7) | 2.003(3) |
| Ir(1)-C(12) [C(1a)] | 2.008(4) | 2.007(9) |          | 2.009(6) | 2.021(3) |          |
| Ir(1)-N(3)          | 2.039(3) | 2.042(7) | 2.057(3) | 2.043(4) | 2.078(3) | 2.050(3) |
| Ir(1)-N(4) [N3a]    | 2.057(3) | 2.055(7) |          | 2.054(5) | 2.069(3) |          |
| Ir(1)-N(1)          | 2.192(3) | 2.207(7) | 2.209(4) | 2.203(5) | 2.222(3) | 2.180(3) |
| Ir(1)-N(2) [N(1a)]  | 2.198(3) | 2.197(7) |          | 2.204(5) | 2.195(5) |          |
| C(1)-Ir(1)-C(12)    | 91.4(2)  | 91.9(3)  | 90.2(2)  | 91.1 (2) | 90.3(2)  | 93.4(2)  |
| C(1)-Ir(1)-N(3)     | 81.0(2)  | 80.7(3)  | 80.5(2)  | 80.2(2)  | 80.9(2)  | 80.2(1)  |
| C(12)-Ir(1)-N(3)    | 91.2(2)  | 94.5(3)  |          | 94.4(2)  | 96.1(1)  |          |
| C(1)-Ir(1)-N(4)     | 94.3(1)  | 94.5(3)  | 93.9 (2) | 95.2(2)  | 90.9(2)  | 95.0(1)  |
| C(12)-Ir(1)-N(4)    | 80.6(2)  | 80.5(3)  |          | 80.3(2)  | 79.9(1)  |          |
| N(3)-Ir(1)-N(4)     | 170.5(1) | 173.0(3) | 172.1(2) | 173.0(2) | 170.8(1) | 173.1(1) |
| C(1)-Ir(1)-N(1)     | 92.2(1)  | 93.8(3)  | 174.3(2) | 96.7(2)  | 98.5(1)  | 93.3(1)  |
| C(12)-Ir(1)-N(1)    | 176.1(2) | 174.2(3) |          | 172.0(2) | 171.1(1) |          |
| N(3)-Ir(1)-N(1)     | 90.8(1)  | 86.4(3)  | 98.8(1)  | 88.6(2)  | 86.8(1)  | 86.9(1)  |
| N(4)-Ir(1)-N(1)     | 97.6(1)  | 99.1(3)  |          | 97.3(2)  | 98.5(1)  |          |
| C(1)-Ir(1)-N(2)     | 170.6(1) | 173.3(3) | 95.5(2)  | 174.7(2) | 177.7(2) | 173.3(1) |
| C(12)-Ir(1)-N(2)    | 97.4(1)  | 94.8(3)  |          | 94.2(2)  | 92.4(1)  |          |
| N(3)-Ir(1)-N(2)     | 95.7(1)  | 99.0(3)  | 87.3(1)  | 99.1(2)  | 99.4(2)  | 98.4(1)  |
| N(4)-Ir(1)-N(2)     | 90.1(1)  | 86.3(3)  |          | 86.0(2)  | 89.0(2)  |          |
| N(1)-Ir(1)-N(2)     | 79.1(1)  | 79.5(3)  | 78.8(2)  | 78.0(2)  | 78.7(1)  | 80.1(1)  |

Symmetry transformations used to generate equivalent atoms:

a)  $x-y+1, -y+2, -z+1/2$  (**2b**) and  $-x+1, y, -z+3/2$  (**4a**)

5

10

15

20

25

30



**Table S4. Emission properties in solution**

| Emission at room temperature |                                    |                                    |                     |                             |                     |                                                      |                                                         |
|------------------------------|------------------------------------|------------------------------------|---------------------|-----------------------------|---------------------|------------------------------------------------------|---------------------------------------------------------|
|                              | $\lambda$ max<br>(nm) <sup>a</sup> | $\lambda$ max<br>(nm) <sup>b</sup> | $\phi$ <sup>a</sup> | $\tau$ <sup>a</sup><br>(ns) | $\phi$ <sup>b</sup> | $10^5 \times k_r$ <sup>a</sup><br>(s <sup>-1</sup> ) | $10^5 \times k_{nr}$ <sup>a</sup><br>(s <sup>-1</sup> ) |
| <b>1</b>                     | 498<br>(523)                       | 502<br>(526)                       | 0.68                | 1600                        | 0.014               | 4.25                                                 | 2                                                       |
| <b>2</b>                     | 498<br>(523)                       | 502<br>(526)                       | 0.68                | 1600                        | 0.015               | 4.25                                                 | 2                                                       |
| <b>3</b>                     | 498<br>(523)                       | 502<br>(526)                       | 0.68                | 1590                        | 0.015               | 4.25                                                 | 2                                                       |
| <b>4</b>                     | 498<br>(523)                       | 502<br>(526)                       | 0.68                | 1570                        | 0.015               | 4.25                                                 | 2                                                       |

<sup>a</sup>data for complexes **1-4** in degassed acetone; <sup>b</sup> data for complex in air equilibrated acetone.

20

25

30

35

40

45

**Table S5. Luminescence lifetimes in solid crystalline organizations**

| Solid state luminescence lifetimes |                            |                            |                            |                            |
|------------------------------------|----------------------------|----------------------------|----------------------------|----------------------------|
| $\tau$ (ns) / Rel. Ampl.           |                            |                            |                            |                            |
|                                    | $\lambda_{\max}$<br>525 nm | $\lambda_{\max}$<br>575 nm | $\lambda_{\max}$<br>630 nm | $\lambda_{\max}$<br>700 nm |
| <b>1c</b>                          | 83 (12%)                   | 119 (23%)                  | 146 (15%)                  | 419 (28%)                  |
|                                    | 250(59%)                   | 366 (58%)                  | 507 (52 %)                 | 920 (53 %)                 |
|                                    | 590(29%)                   | 1240(19%)                  | 1570(33%)                  | 2700(19%)                  |
| <b>2a</b>                          | 353(41%)                   | 394 (48 %)                 | 706 (65 %)                 | 813 (78 %)                 |
|                                    | 795(59%)                   | 941(52 %)                  | 1830(35%)                  | 2700(22%)                  |
| <b>2b</b>                          | 3 (61 %)                   | 3 (56 %)                   | 6 (21%)                    | 55 (18 %)                  |
|                                    | 6 (34 %)                   | 30 (11 %)                  | 86 (22 %)                  | 90 (3 %)                   |
|                                    | 48 (5 %)                   | 300 (33 %)                 | 533 (57 %)                 | 246 (40 %)                 |
| <b>3a</b>                          | 23 (23 %)                  | 23 (26 %)                  | 32 (29 %)                  | 39 (16%)                   |
|                                    | 58 (67 %)                  | 64 (52 %)                  | 120 (34%)                  | 155 (39 %)                 |
|                                    | 225(10%)                   | 428 (22 %)                 | 735 (37 %)                 | 820 (45%)                  |
| <b>3b</b>                          | 4 (6%)                     | 27 (13%)                   | 37 (17%)                   | 56 (17 %)                  |
|                                    | 29 (42 %)                  | 96 (55 %)                  | 150 (36 %)                 | 230 (39 %)                 |
|                                    | 90 (52 %)                  | 390 (32%)                  | 710 (47 %)                 | 880 (44 %)                 |
| <b>4</b>                           | 19 (6%)                    | 14 (3 %)                   | 310 (22 %)                 | 370 (24 %)                 |
|                                    | 138(45%)                   | 208 (44 %)                 | 963 (58 %)                 | 965 (54 %)                 |
|                                    | 390(49%)                   | 940 (53 %)                 | 2500(20%)                  | 2500(22%)                  |
